## CORRECTION

## Correction: PHF7 is a novel histone H2A E3 ligase prior to histone-to-protamine exchange during spermiogenesis

Xiukun Wang, Jun-Yan Kang, Leixin Wei, Xiaogan Yang, Hongduo Sun, Suming Yang, Lei Lu, Meng Yan, Meizhu Bai, Yanyan Chen, Juanjuan Long, Na Li, Dangsheng Li, Jing Huang, Ming Lei, Zhen Shao, Wen Yuan, Erwei Zuo, Kehuan Lu, Mo-Fang Liu and Jinsong Li

A reader alerted the journal to duplicated images in Fig. 2C and Fig. 4D of *Development* (2019) 146, dev175547 (doi:10.1242/dev.175547).

In the top panel of Fig. 4D, the bottom part of Stage I and the top part of Stage II-III images show an overlap. This is permissible since spermatogenesis is a continuous process from stage I to stage XII in seminiferous tubules and the panels are all from the same animal. The authors have, however, added an explanation to the legend to avoid any misunderstanding.

**Fig. 4. The RING domain of PHF7 specifically ubiquitylates histone H2A in spermatids.** (D) Hematoxylin and Eosin staining of testis sections from an 8-week-old WT and an 8-week-old *Phf7*<sup>RINGmut</sup> mouse. Stages of seminiferous epithelium cycles were determined by the morphology of spermatocytes and round spermatids from each animal. Note that as spermatogenesis is a continuous process, some overlap of stage I to stage XII panels is shown. Pl, preleptotene; L, leptotene; Z, zygotene; P, pachytene; D, diplotene; RS, round spermatids; ES, elongating spermatids. Scale bars: 20 µm.

The authors mistakenly used the wrong merge image for WT histone H4 in the bottom row when assembling Fig. 2C. The corrected and original figure panels are shown below.

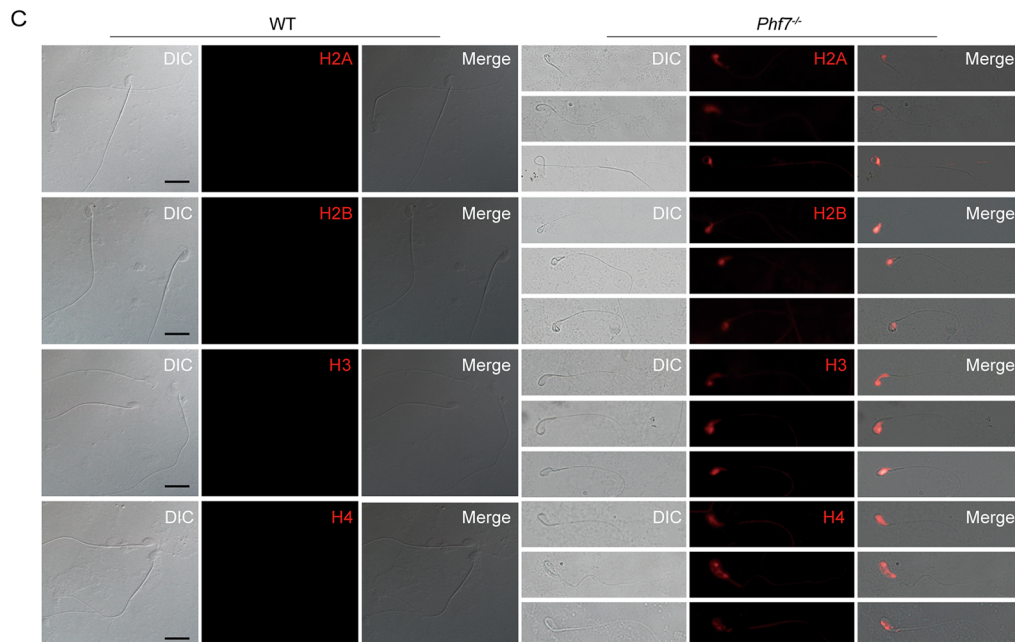

**Fig. 2C (corrected panel).** Histone-to-protamine exchange is impaired during spermatogenesis in *Phf7* knockout mice. (C) Immunostaining of core histones (H2A, H2B, H3 and H4) (red) in sperm from 8-week-old *Phf7*<sup>-/-</sup> and wild-type males. Scale bar: 20 µm.

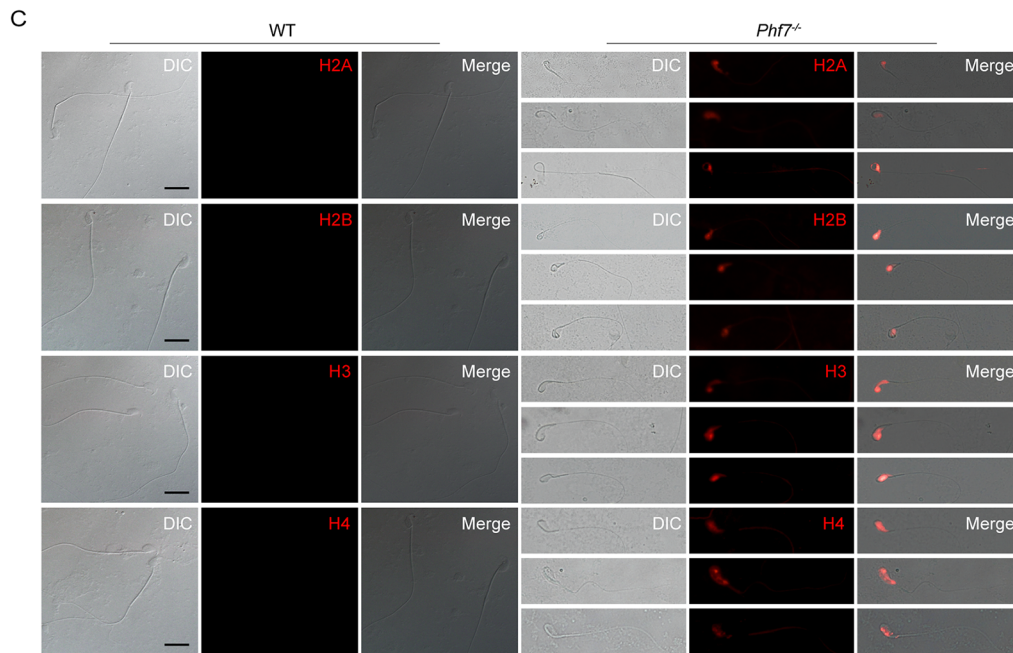

**Fig. 2C (original panel). Histone-to-protamine exchange is impaired during spermatogenesis in *Phf7* knockout mice.** (C) Immunostaining of core histones (H2A, H2B, H3 and H4) (red) in sperm from 8-week-old *Phf7*<sup>-/-</sup> and wild-type males. Scale bar: 20  $\mu$ m.

Both the online full-text and PDF versions have been updated and the authors apologize to readers for these errors and any inconvenience they may have caused.
